# Supplementary material
Source: MDPI journal article supplement (https://www.mdpi.com/1424-8247/14/8/759)
Supplement: s1 [file s1]

## Supporting Information

# ***In vitro* antiviral activity of tyrosinase from mushroom *Agaricus bisporus* against hepatitis C virus**

David Lopez-Tejedor,<sup>1</sup> Rafael Clavería-Gimeno,<sup>2-6</sup> Adrian Velazquez-Campoy,<sup>3-7</sup> Olga Abian<sup>2-6\*</sup> and Jose M. Palomo<sup>1,\*</sup>

## **Methods**

### *SDS-PAGE*

12% separating gel and 4% stacking gel were used for SDS-PAGE. The samples were heated at 100 °C for 5 minutes (at least) in Eppendorf tubes in 1:1 ratio with 2X loading buffer (4% w/v of SDS, 8% v/v of glycerol, 4 mM of beta-mercaptoethanol, 80 mM Tris-HCl pH 6.8 and 0.02% of Bromophenol Blue) and the electrophoresis was performed in PerfectBlue™ Dual Gel Twin S (PEQLAB) with power supplier PS 300-B (AlphaMetrix) at 185 V for 72 minutes in Tris-HCl buffer pH 8.3. After that, Coomassie blue (G-250) and silver staining were used. GelAnalyzer2010 software was used for detection and quantification of protein bands.

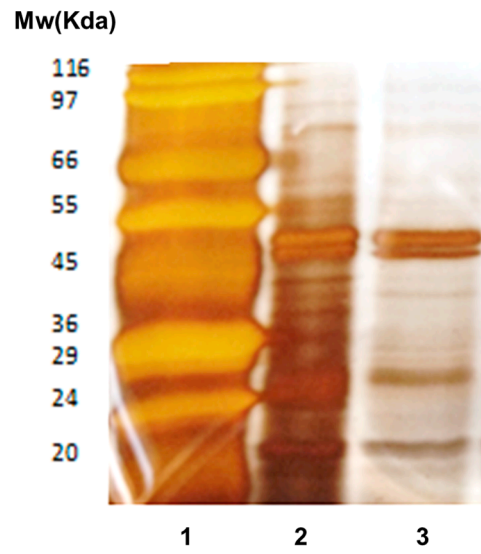

**Figure S1.** SDS-PAGE with silver staining of the commercial extract of *A. bisporus* from Sigma. Lane 1: molecular marker. Lane 2. Tyrosinase extract from Sigma 0.25 mg protein/mL. Lane 3. Tyrosinase extract from Sigma 0.1 mg protein/mL.

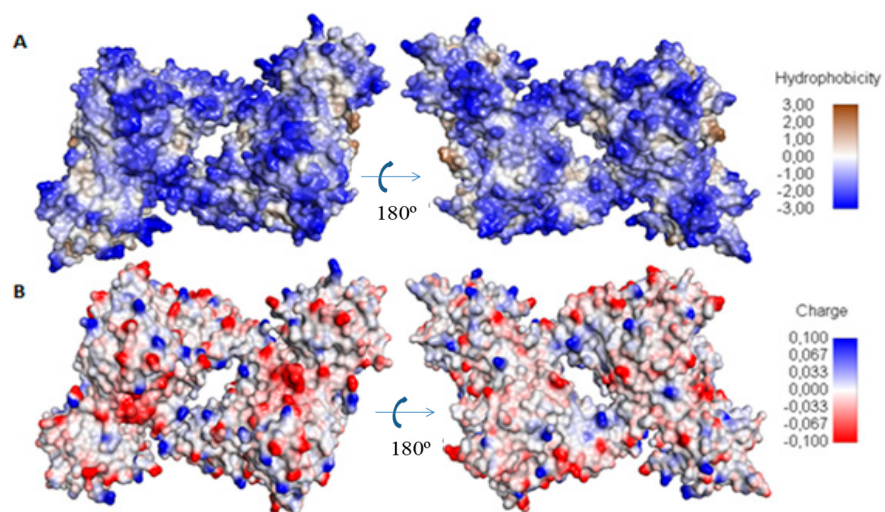

**Figure S1.** *Agaricus bisporus* tyrosinase surface structure. A) Hydrophobicity distribution, B) Charge distribution, front and back (PDB 2Y9W).

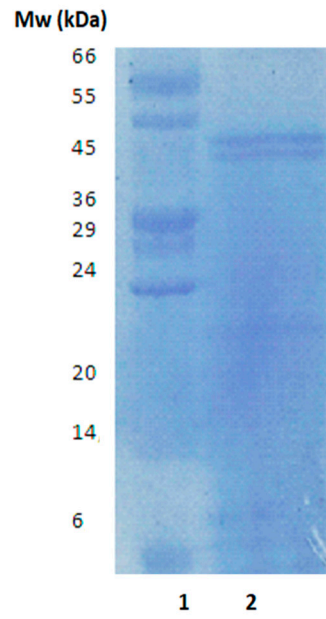

**Figure S3.** SDS-PAGE- coomassie staining analysis of the two-step chromatography purification cascade. Lane 1 – Molecular Weight marker. Lane 2- supernatant of C18 adsorption at 100 mM buffer pH 7 of tyrosine extract after desorption with 0.2 % triton X-100.

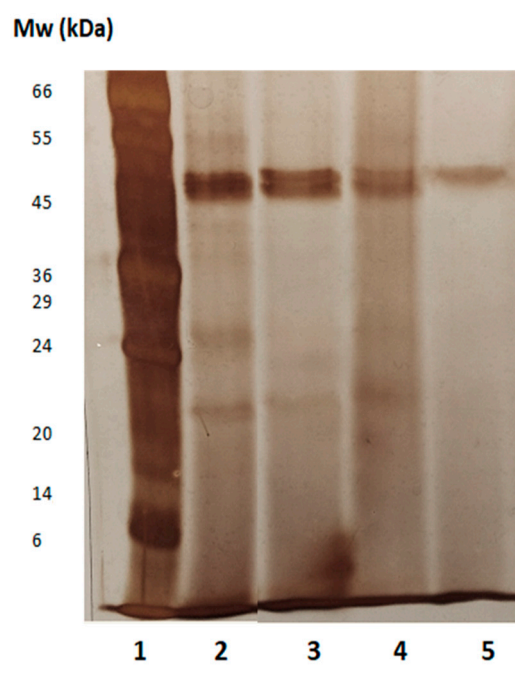

**Figure S4.** SDS-PAGE analysis of the two-step chromatography purification process for *TyrAB* and *Tyr50kDa*. Lane 1 – Molecular Weight marker. Lane 2 – tyrosinase extract from Sigma. Lane 3 – supernatant of C18 adsorption in distilled water. Lane 4 –supernatant on C18 support at 100 mM buffer +0.07% triton solution. Lane 6 – supernatant after C18 (lane 5) immobilization (only Tyr50kDa remaining).

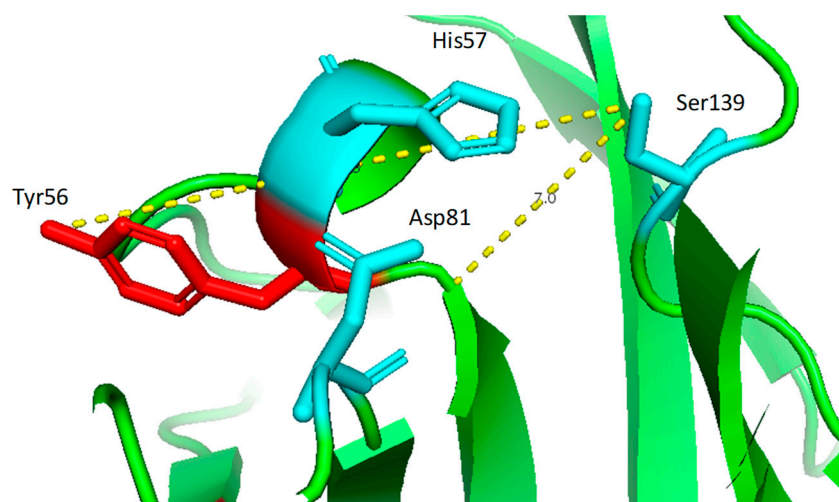

**Figure S5.** 3D structure of the active site area of phosphoprotein NS5A. Active site amino acids (blue), Tyr56 (red). Structure was obtained from PDB data bank with following codes: 1zh1. Figure was drawn using Pymol program.

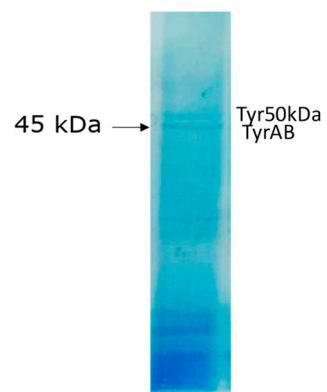

**Figure S6.** SDS-PAGE with coomassie staining of the enzymes solution directly produced from fresh mushrooms. Lane 1: Tyrosinases solution.

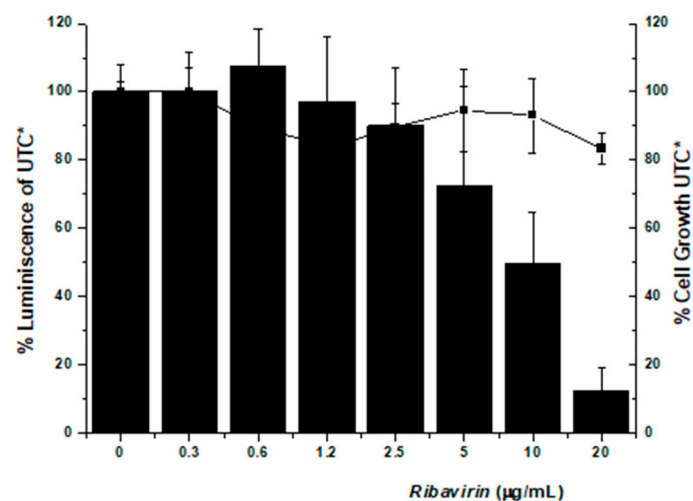

**Figure S7.** Inhibition of the Hepatitis C virus (HCV) replicon in cell assays. Evaluation of the potency and cytotoxicity of Ribavirin in cell (Huh-5-2-) assays. HCV replicon replication rate (luminescence, black bars) and cell survival (closed squares) were independently measured in cell culture by increasing protein concentration to determine EC50. \*All luminescence and viability values have been normalized considering the untreated control values (UTC).
